# Supplementary material for: The reaction kinetics and mechanism of catalytic decomposition of hydrazine nitrate on Ru/C catalyst in nitric acid solutions
Source: Royal Society of Chemistry journal article supplement (doi:10.1039/d3nj00193h), 2023-01-01
Supplement: d3nj00193h1.pdf [file d3nj00193h1.pdf]

## Supporting Information

The Reaction Kinetics and Mechanism of Catalytic Decomposition of Hydrazine  
nitrate on Ru/C Catalyst in Nitric Acid Solutions

Baole Li,<sup>\*a‡</sup> Tiansheng He,<sup>a‡</sup> Chen Zuo,<sup>a</sup> Zhi Cao,<sup>a</sup> Taihong Yan<sup>a</sup> and Weifang Zheng<sup>\*a</sup>

Department of Radiochemistry, China Institute of Atomic Energy, Beijing, 102413, China.

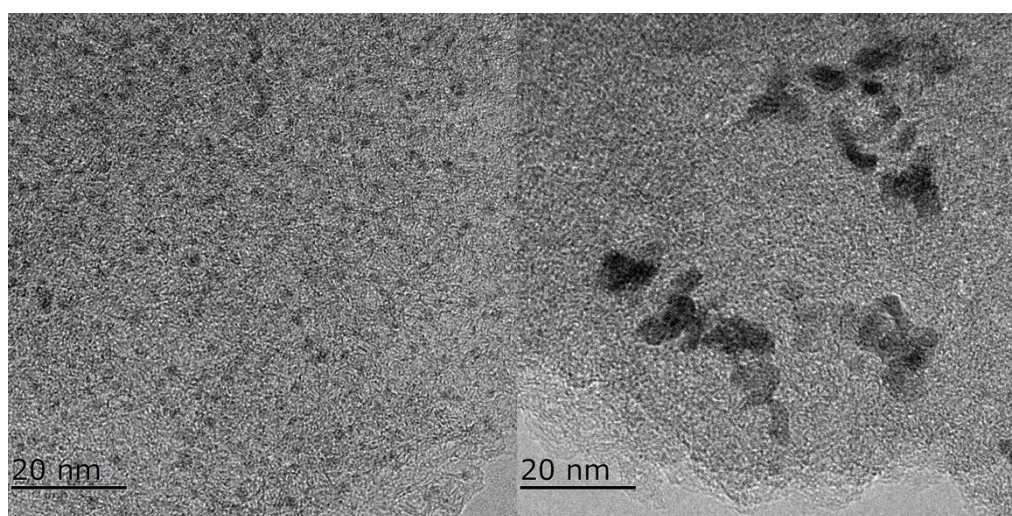

Fig.S1 TEM images for the fresh (left) and used (right) Ru/C catalyst.

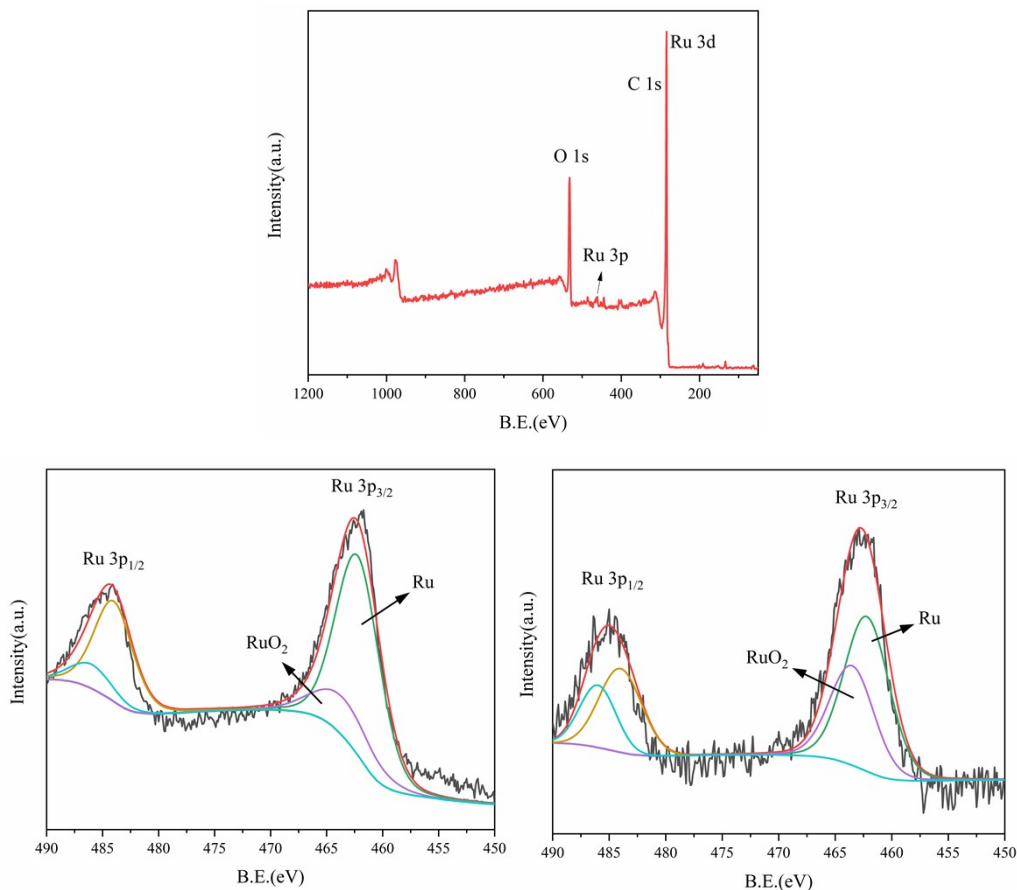

Fig. S2 XPS full spectrum of fresh Ru/C (top) and Ru 3p XPS spectra of Ru/C fresh catalyst (bottom left), used catalyst (bottom right)

Table S1 XPS results of fresh and reused Ru/C catalysts

| Catalyst | Ru species       | Peak area         |                   | Ru <sup>0</sup> / Ru <sup>4+</sup> |
|----------|------------------|-------------------|-------------------|------------------------------------|
|          |                  | 3p <sub>3/2</sub> | 3p <sub>1/2</sub> |                                    |
| Fresh    | Ru <sup>0</sup>  | 7763.032          | 3627.448          | 3.76                               |
|          | Ru <sup>4+</sup> | 2077.023          | 960.738           |                                    |
| Used     | Ru <sup>0</sup>  | 3348.431          | 1633.251          | 1.57                               |
|          | Ru <sup>4+</sup> | 2131.265          | 1040.130          |                                    |

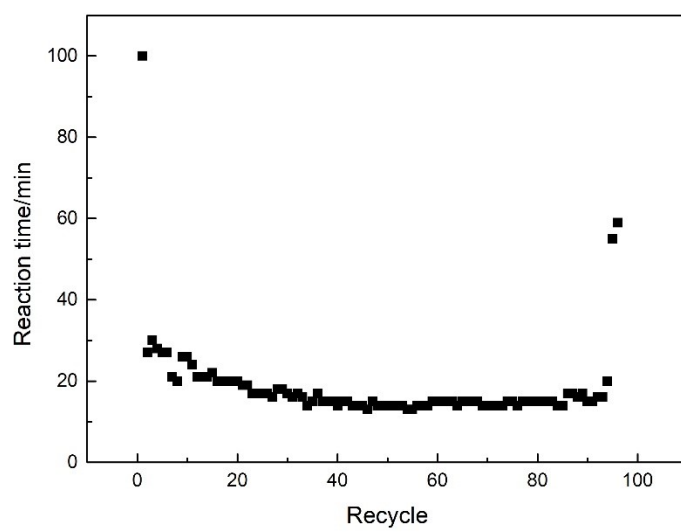

Fig.S3 Experimental results of Ru/C catalyst recycling performance
